# Supplementary material
Source: Springer Nature journal article supplement (https://www.springermedizin.de/resource/supplementary/13054_2008_6541_MOESM6_ESM.pdf/9727712)

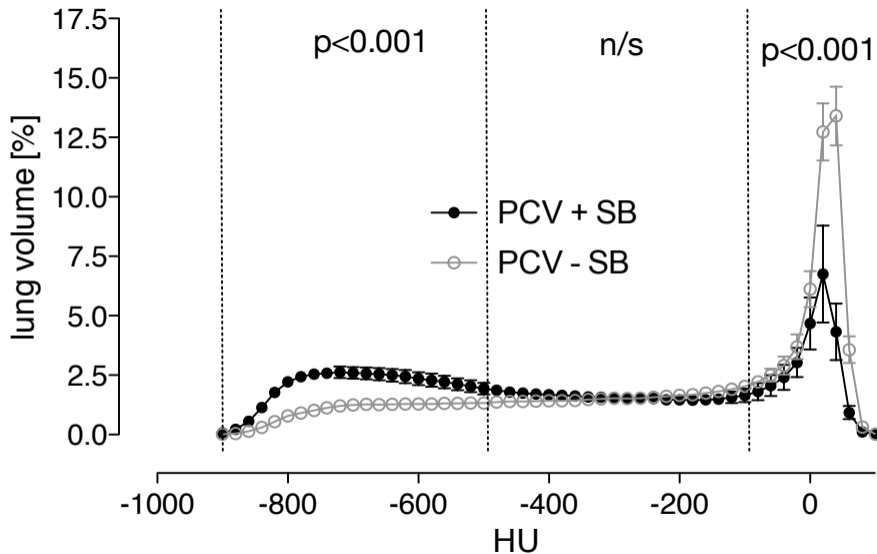

Supplement: MOESM6 [file 9727712]
